# Supplementary material
Source: publisher figshare collection journal article supplement (https://wiley.figshare.com/ndownloader/files/33573923)
Supplement: Supplementary file 1 [file 33573923]

## Sheet: Atrazine
Frog Whole Body Homogenates
ID	Group	atrazine	alachlor	urea	ppm	BCF
Z1	Z	Yes	No	No	0.201299	0.0199046
Z2	Z	Yes	No	No	0.386685	0.0562808
Z3	Z	Yes	No	No	0.486292	0.051684
Z4	Z	Yes	No	No	0.636583	0.0441857
Z5	Z	Yes	No	No	1.49854	0.125373
Z6	Z	Yes	No	No	1.08866	0.0771536
Z7	Z	Yes	No	No	1.28526	0.0779298
Z8	Z	Yes	No	No	0.682723	0.058834
Z9	Z	Yes	No	No	0.160267	0.0108393
Z10	Z	Yes	No	No	0.391576	0.0178591
Z11	Z	Yes	No	No	0.354804	0.0327293
Z12	Z	Yes	No	No	0.173367	0.0167328
ZL1	ZL	Yes	Yes	No	0.0877878	0.0148874
ZL2	ZL	Yes	Yes	No	0.489358	0.05425
ZL3	ZL	Yes	Yes	No	0.304651	0.0510864
ZL4	ZL	Yes	Yes	No	0.157113	0.0167815
ZL5	ZL	Yes	Yes	No	0.522233	0.0858154
ZL6	ZL	Yes	Yes	No	0.285586	0.0312086
ZL7	ZL	Yes	Yes	No	1.05224	0.109235
ZL8	ZL	Yes	Yes	No	1.18125	0.129539
ZL9	ZL	Yes	Yes	No	0.698236	0.0782178
ZL10	ZL	Yes	Yes	No	0.0878662	0.0119374
ZL11	ZL	Yes	Yes	No	0.345654	0.0283394
ZL12	ZL	Yes	Yes	No	2.40496	0.143913
ZLN1	ZLN	Yes	Yes	Yes	0.306546	0.026655
ZLN2	ZLN	Yes	Yes	Yes	1.25953	0.134972
ZLN3	ZLN	Yes	Yes	Yes	3.59217	0.492832
ZLN4	ZLN	Yes	Yes	Yes	1.39116	0.118386
ZLN5	ZLN	Yes	Yes	Yes	0.455882	0.0393172
ZLN6	ZLN	Yes	Yes	Yes	1.28744	0.142743
ZLN7	ZLN	Yes	Yes	Yes	0.522726	0.0731102
ZLN8	ZLN	Yes	Yes	Yes	0.400476	0.017917
ZLN9	ZLN	Yes	Yes	Yes	0.550317	0.0789952
ZLN10	ZLN	Yes	Yes	Yes	1.51193	0.194242
ZLN11	ZLN	Yes	Yes	Yes	1.0409	0.117973
ZLN12	ZLN	Yes	Yes	Yes	5.90787	0.54011
ZN1	ZN	Yes	No	Yes	0.781011	0.0867897
ZN2	ZN	Yes	No	Yes	5.03512	0.793221
ZN3	ZN	Yes	No	Yes	0.0812288	0.00935793
ZN4	ZN	Yes	No	Yes	0.691349	0.0749419
ZN5	ZN	Yes	No	Yes	0.403556	0.0575595
ZN6	ZN	Yes	No	Yes	0.560687	0.0622829
ZN7	ZN	Yes	No	Yes	0.366308	0.0470201
ZN8	ZN	Yes	No	Yes	0.59787	0.0706222
ZN9	ZN	Yes	No	Yes	0.212078	0.0250339
ZN10	ZN	Yes	No	Yes	0.78687	0.0725722
ZN11	ZN	Yes	No	Yes	3.07131	0.314417
ZN12	ZN	Yes	No	Yes	0.183363	0.0222067

## Sheet: Alachlor
Frog Whole Body Homogenates
ID	Group	atrazine	alachlor	urea	ppm	BCF
L1	L	No	Yes	No	1.35656	0.0701487
L2	L	No	Yes	No	0.319344	0.0218965
L3	L	No	Yes	No	1.16301	0.0821238
L4	L	No	Yes	No	2.22061	0.104597
L5	L	No	Yes	No	2.26528	0.121152
L6	L	No	Yes	No	1.41496	0.0932208
L7	L	No	Yes	No	1.9678	0.0856405
L8	L	No	Yes	No	1.06972	0.0409402
L9	L	No	Yes	No	0.327355	0.0403261
L10	L	No	Yes	No	0.953316	0.129671
L11	L	No	Yes	No	0.426337	0.032846
L12	L	No	Yes	No	1.36136	0.105281
LN1	LN	No	Yes	Yes	5.19619	0.267595
LN2	LN	No	Yes	Yes	0.501941	0.0553825
LN3	LN	No	Yes	Yes	0.363871	0.0376534
LN4	LN	No	Yes	Yes	0.989808	0.0539019
LN5	LN	No	Yes	Yes	1.67669	0.0714911
LN6	LN	No	Yes	Yes	1.94344	0.114819
LN7	LN	No	Yes	Yes	1.13264	0.0364123
LN8	LN	No	Yes	Yes	0.941861	0.0539849
LN9	LN	No	Yes	Yes	1.79541	0.0942977
LN10	LN	No	Yes	Yes	1.01444	0.0596897
LN11	LN	No	Yes	Yes	0.700398	0.0244748
LN12	LN	No	Yes	Yes	1.27274	0.062913
ZL1	ZL	Yes	Yes	No	0.67527	0.0563294
ZL2	ZL	Yes	Yes	No	1.21013	0.0693052
ZL3	ZL	Yes	Yes	No	0.791667	0.0684549
ZL4	ZL	Yes	Yes	No	0.101773	0.00600217
ZL5	ZL	Yes	Yes	No	2.78938	0.243051
ZL6	ZL	Yes	Yes	No	1.69245	0.0952979
ZL7	ZL	Yes	Yes	No	3.47963	0.238406
ZL8	ZL	Yes	Yes	No	1.21175	0.000944028
ZL9	ZL	Yes	Yes	No	1.06746	0.0811504
ZL10	ZL	Yes	Yes	No	0.506628	0.0461515
ZL11	ZL	Yes	Yes	No	1.01945	0.057053
ZL12	ZL	Yes	Yes	No	4.38338	0.187627
ZLN1	ZLN	Yes	Yes	Yes	0.951058	0.0568119
ZLN2	ZLN	Yes	Yes	Yes	2.08984	0.147112
ZLN3	ZLN	Yes	Yes	Yes	6.61248	0.573241
ZLN4	ZLN	Yes	Yes	Yes	3.28099	0.180531
ZLN5	ZLN	Yes	Yes	Yes	0.372113	0.0210832
ZLN6	ZLN	Yes	Yes	Yes	6.08566	0.445016
ZLN7	ZLN	Yes	Yes	Yes	0.474179	0.0459492
ZLN8	ZLN	Yes	Yes	Yes	0.0893053	0.00296694
ZLN9	ZLN	Yes	Yes	Yes	0.876478	0.0880436
ZLN10	ZLN	Yes	Yes	Yes	1.98127	0.166655
ZLN11	ZLN	Yes	Yes	Yes	1.65738	0.12692
ZLN12	ZLN	Yes	Yes	Yes	1.17849	0.0775026

## Sheet: CORT
ID	Treatment	Cort by Mass	Cort by SVL
C1	C	692.851	691.928
C2	C	361.083	354.062
C3	C	236.436	200.015
C4	C	405.074	369.158
C5	C	149.392	131.586
C6	C	153.383	163.11
C7	C	317.617	410.695
C8	C	250.494	148.41
C9	C	506.371	455.623
C10	C	56.0254	68.2563
C11	C	365.049	297.432
C12	C	309.818	276.457
L1	L	447.704	426.34
L2	L	564.273	394.449
L3	L	268.297	273.035
L4	L	99.609	107.44
L5	L	323.287	258.74
L6	L	214.578	272.462
L7	L	229.782	172.774
L8	L	848.614	628.601
L9	L	494.423	360.783
L10	L	239.054	228.452
L11	L	335.996	334.016
L12	L	310.324	294.401
LN1	LN	135.196	97.8854
LN2	LN	179.554	145.252
LN3	LN	126.974	130.738
LN4	LN	181.821	215.814
LN5	LN	128.316	123.783
LN6	LN	77.3764	81.6
LN7	LN	190.66	181.338
LN8	LN	208.574	213.199
LN9	LN	129.436	130.44
LN10	LN	177.858	272.597
LN11	LN	529.908	420.797
LN12	LN	248.498	231.539
N1	N	239.624	183.445
N2	N	265.414	263.476
N3	N	158.695	147.569
N4	N	140.146	146.892
N5	N	152.133	143.271
N6	N	116.86	104.867
N7	N	425.789	396.075
N8	N	1117.68	735.576
N9	N	153.497	109.238
N10	N	84.0506	55.4301
N11	N	582.916	440.608
N12	N	361.934	392.412
Z1	Z	127.299	114.726
Z2	Z	411.246	369.711
Z3	Z	633.681	481.46
Z4	Z	906.759	932.891
Z5	Z	98.8488	90.452
Z6	Z	489.395	333.202
Z7	Z	352.428	500.14
Z8	Z	69.0296	75.6073
Z9	Z	105.904	102.086
Z10	Z	75.2069	87.1232
Z11	Z	214.945	229.095
Z12	Z	128.944	120.026
ZL1	ZL	193.598	197.099
ZL2	ZL	320.237	230.605
ZL3	ZL	230.292	160.993
ZL4	ZL	1580.96	1318.73
ZL5	ZL	565.301	431.814
ZL6	ZL	520.783	396.571
ZL7	ZL	57.4953	56.9799
ZL8	ZL	427.272	254.004
ZL9	ZL	389.462	266.837
ZL10	ZL	157.254	171.334
ZL11	ZL	470.904	310.612
ZL12	ZL	600.093	390.47
ZLN1	ZLN	648.82	525.317
ZLN2	ZLN	174.918	123
ZLN3	ZLN	505.748	449.485
ZLN4	ZLN	992.599	1236.32
ZLN5	ZLN	1243.25	936.315
ZLN6	ZLN	495.387	375.493
ZLN7	ZLN	349.803	404.843
ZLN8	ZLN	66.9514	57.2381
ZLN9	ZLN	609.275	497.548
ZLN10	ZLN	1350.22	740.027
ZLN11	ZLN	1321.76	1388.3
ZLN12	ZLN	1057.35	888.251
ZN1	ZN	385.727	260.475
ZN2	ZN	284.247	177.392
ZN3	ZN	858.58	751.754
ZN4	ZN	306.168	393.333
ZN5	ZN	223.678	143.934
ZN6	ZN	565.325	556.426
ZN7	ZN	163.77	155.856
ZN8	ZN	415.992	329.003
ZN9	ZN	297.788	219.603
ZN10	ZN	361.115	285.017
ZN11	ZN	561.064	339.217
ZN12	ZN	130.815	121.635

## Sheet: ACHE
ID	Group	Replicate	ATZ	ALA	N	AChE(mol/min/mg)
C1	C	1	No	No	No	0.0065763
C2	C	2	No	No	No	0.0154386
C3	C	3	No	No	No	0.00743998
C4	C	4	No	No	No	0.011342
C5	C	5	No	No	No	0.012629
C6	C	6	No	No	No	0.0145139
C7	C	7	No	No	No	0.0121457
C8	C	8	No	No	No	0.0203184
C9	C	9	No	No	No	0.0170923
C10	C	10	No	No	No	0.0109358
C11	C	11	No	No	No	0.0171159
C12	C	12	No	No	No	0.0398733
L1	L	1	No	Yes	No	0.0165384
L2	L	2	No	Yes	No	0.0177286
L3	L	3	No	Yes	No	0.0132222
L4	L	4	No	Yes	No	0.00481778
L5	L	5	No	Yes	No	0.0133489
L6	L	6	No	Yes	No	0.0122036
L7	L	7	No	Yes	No	0.0238313
L8	L	8	No	Yes	No	0.0325472
L9	L	9	No	Yes	No	0.0118903
L10	L	10	No	Yes	No	0.0317829
L11	L	11	No	Yes	No	0.0228306
L12	L	12	No	Yes	No	0.0225602
LN1	LN	1	No	Yes	Yes	0.0240093
LN2	LN	2	No	Yes	Yes	0.0113987
LN3	LN	3	No	Yes	Yes	0.0174149
LN4	LN	4	No	Yes	Yes	0.00620469
LN5	LN	5	No	Yes	Yes	0.0140584
LN6	LN	6	No	Yes	Yes	0.00533754
LN7	LN	7	No	Yes	Yes	0.0138915
LN8	LN	8	No	Yes	Yes	0.015866
LN9	LN	9	No	Yes	Yes	0.0236845
LN10	LN	10	No	Yes	Yes	0.0145785
LN11	LN	11	No	Yes	Yes	0.00879347
LN12	LN	12	No	Yes	Yes	0.0147322
N1	N	1	No	No	Yes	0.00928946
N2	N	2	No	No	Yes	0.00772138
N3	N	3	No	No	Yes	0.0101882
N4	N	4	No	No	Yes	0.0101344
N5	N	5	No	No	Yes	0.0140757
N6	N	6	No	No	Yes	0.0111223
N7	N	7	No	No	Yes	0.0200379
N8	N	8	No	No	Yes	0.0219704
N9	N	9	No	No	Yes	0.0199038
N10	N	10	No	No	Yes	0.0109036
N11	N	11	No	No	Yes	0.0114644
N12	N	12	No	No	Yes	0.0299817
Z1	Z	1	Yes	No	No	0.00781252
Z2	Z	2	Yes	No	No	0.0183176
Z3	Z	3	Yes	No	No	0.0355732
Z4	Z	4	Yes	No	No	0.0216687
Z5	Z	5	Yes	No	No	0.0302655
Z6	Z	6	Yes	No	No	0.0249966
Z7	Z	7	Yes	No	No	0.0179806
Z8	Z	8	Yes	No	No	0.0212099
Z9	Z	9	Yes	No	No	0.0373715
Z10	Z	10	Yes	No	No	0.0150428
Z11	Z	11	Yes	No	No	0.0194674
Z12	Z	12	Yes	No	No	0.0149479
ZL1	ZL	1	Yes	Yes	No	0.015823
ZL2	ZL	2	Yes	Yes	No	0.0306927
ZL3	ZL	3	Yes	Yes	No	0.0317835
ZL4	ZL	4	Yes	Yes	No	0.0136286
ZL5	ZL	5	Yes	Yes	No	0.0159164
ZL6	ZL	6	Yes	Yes	No	0.0368013
ZL7	ZL	7	Yes	Yes	No	0.0208708
ZL8	ZL	8	Yes	Yes	No	0.0191383
ZL9	ZL	9	Yes	Yes	No	0.0192714
ZL10	ZL	10	Yes	Yes	No	0.0227053
ZL11	ZL	11	Yes	Yes	No	0.0355654
ZL12	ZL	12	Yes	Yes	No	0.0217218
ZLN1	ZLN	1	Yes	Yes	Yes	0.0217948
ZLN2	ZLN	2	Yes	Yes	Yes	0.0122546
ZLN3	ZLN	3	Yes	Yes	Yes	0.0155347
ZLN4	ZLN	4	Yes	Yes	Yes	0.0110102
ZLN5	ZLN	5	Yes	Yes	Yes	0.0113208
ZLN6	ZLN	6	Yes	Yes	Yes	0.0191245
ZLN7	ZLN	7	Yes	Yes	Yes	0.010528
ZLN8	ZLN	8	Yes	Yes	Yes	0.0152574
ZLN9	ZLN	9	Yes	Yes	Yes	0.0117374
ZLN10	ZLN	10	Yes	Yes	Yes	0.0357752
ZLN11	ZLN	11	Yes	Yes	Yes	0.0133583
ZLN12	ZLN	12	Yes	Yes	Yes	0.00755495
ZN1	ZN	1	Yes	No	Yes	0.0402345
ZN2	ZN	2	Yes	No	Yes	0.0267184
ZN3	ZN	3	Yes	No	Yes	0.0306411
ZN4	ZN	4	Yes	No	Yes	0.00680168
ZN5	ZN	5	Yes	No	Yes	0.0167031
ZN6	ZN	6	Yes	No	Yes	0.0162
ZN7	ZN	7	Yes	No	Yes	0.0130686
ZN8	ZN	8	Yes	No	Yes	0.0255448
ZN9	ZN	9	Yes	No	Yes	0.0119912
ZN10	ZN	10	Yes	No	Yes	0.00868488
ZN11	ZN	11	Yes	No	Yes	0.0171737
ZN12	ZN	12	Yes	No	Yes	0.0160003
